# Supplementary material
Source: ML conference proceedings conference paper supplement (https://openreview.net/forum?id=gxgPjFjGmd)
Supplement: supplementary_material [file Appendix.pdf › Appendix.pdf]

## 1 A Demo Videos

2 To further showcase the effectiveness of OriGS in real-world scenarios, we include additional video  
3 demonstrations of in-the-wild 4D reconstruction in the supplementary material. Following the  
4 same experimental setup as in the main paper, we present visualizations of both training sequence  
5 reconstruction and novel view synthesis, comparing OriGS with the recent state-of-the-art 4D  
6 reconstruction system. In addition, we provide video demonstrations of the OriGS variants designed  
7 in our ablation study, illustrating how individual components affect reconstruction quality. These  
8 results collectively highlight the temporal consistency and structural fidelity of OriGS across diverse  
9 scenes and motion patterns.

## 10 B Implementation Details

11 **Oriented Anchor Initialization.** We follow a similar initialization pipeline provided in recent  
12 open-source codebases of dynamic reconstruction frameworks [12, 8]. Specifically, we first extract  
13 long-range 2D point trajectories using SpatialTracker [13] and obtain per-frame depth maps using  
14 DepthCrafter [5]. These 2D correspondences are lifted into 3D space using estimated camera  
15 parameters from bundle adjustment [8]. The resulting 3D trajectories are then converted into oriented  
16 anchors, whose initial principal directions are estimated by applying PCA over early-frame motion.  
17 In our experiments, we set the temporal window size  $W = 5$ . This step provides a stable estimate of  
18 forward direction, which is then temporally propagated to form our Global Orientation Field.

19 **Hyper-Gaussian Parameterization.** We adopt the 3D Gaussian Splatting (3DGS) [7] as the base rep-  
20 resentation and extend each Gaussian primitive with a hyper-Gaussian parameterized by a canonical  
21 state  $\mu_{\xi}$  and a Cholesky-decomposed covariance  $\Sigma_{\xi} = \mathbf{L}_{\xi}\mathbf{L}_{\xi}^{\top}$ , where  $\mathbf{L}_{\xi}$  is a lower-triangular matrix  
22 [3, 4, 2]. To improve computational efficiency, we avoid constructing the full covariance matrix  $\Sigma_{\xi}$ .  
23 Instead, we further factor it into two learnable subcomponents: (i) a marginal covariance  $\Sigma_{(t, \mathbf{O})}$   
24 over temporal and orientational variables, which inherits the Cholesky-decomposed parameterization  
25 to ensure positive semi-definiteness, and (ii) a cross-covariance term  $\Sigma_{(\Delta \mathbf{p}, \Delta \mathbf{g}), (t, \mathbf{O})}$  that captures  
26 the correlation between dynamic geometry  $(\Delta \mathbf{p}, \Delta \mathbf{g})$  and temporal-orientational context. During  
27 training, we jointly optimize these covariance terms along with the canonical mean  $\mu_{\xi}$  and the  
28 original 3DGS parameters (position, scale, rotation, color, and opacity). This factorization strategy  
29 circumvents the overhead of full matrix parameterization while retaining the necessary statistical  
30 coupling for efficient conditioned slicing.

31 **Optimization.** We optimize the model using the differentiable rasterization-based rendering pipeline  
32 from 3DGS [7], adapted to support high-dimensional slicing and dynamic modulation. The loss  
33 function combines: (i) photometric loss [7], an RGB reconstruction loss between rendered and  
34 ground-truth images, (ii) 2D correspondence loss, alignment to long-range 2D tracks and depth  
35 priors from foundation models, as in [12, 8, 9, 10], and (iii) deformation regularization, an as-rigid-  
36 as-possible constraint [13, 11, 1, 6] applied to anchor-guided transformations. For scalability and  
37 high-fidelity reconstruction, we also design a pruning-and-densification scheme: Gaussian primitives  
38 with low opacity are pruned, while spatial regions exhibiting high response gradients with respect  
39 to  $\mu_{\mathbf{p}}$  and  $\mu_{\Delta \mathbf{p}}$  are densified through local duplication. All experiments are conducted on a single  
40 NVIDIA RTX A6000 GPU, and the full optimization of a typical scene takes approximately 0.5–2  
41 hours, depending on video length and complexity.

## 42 C Limitations

43 While OriGS demonstrates promising results, it also presents certain limitations. (i) In scenes  
44 dominated by simple motion, such as near-rigid translation along a fixed axis, orientation tends  
45 to remain approximately constant over time. Consequently, conditioning on these orientational  
46 cues may offer limited additional benefit, yet our framework still incurs unnecessary optimization  
47 complexity of high-dimensional modeling. Future work could explore adaptive mechanisms that  
48 modulate the use or dimensionality of orientation cues based on the complexity of motion in the  
49 scene. (ii) OriGS leverages 2D priors such as point trajectories and depth from vision foundation  
50 models to initialize and optimize the orientation field. The reliability of these priors can affect the  
51 quality of 4D reconstruction. This reflects a deeper challenge tied to the development of reliable  
52 visual priors, which has long been a cornerstone of progress in computer vision research.

## 53 D Broader Impacts

54 OriGS provides a unified framework for reconstructing dynamic scenes from casual monocular  
55 videos, which can benefit various real-world applications. For instance, in virtual and augmented  
56 reality, OriGS can reconstruct dynamic environments or actors from consumer-grade video input  
57 alone, lowering the barrier to immersive content creation. Our work can also support robotics and  
58 behavioral analysis, especially where low-cost monocular capture is the only viable option. However,  
59 as with other scene reconstruction techniques, OriGS could potentially be misused for unauthorized  
60 replication of environments or individuals. While our framework is not designed for such misconduct,  
61 responsible usage should consider privacy and ethical concerns.

## 62 References

- 63 [1] Marc Alexa, Daniel Cohen-Or, and David Levin. As-rigid-as-possible shape interpolation. In  
64 *Seminal Graphics Papers: Pushing the Boundaries, Volume 2*, pages 165–172. 2023.
- 65 [2] Stavros Diolatzis, Tobias Zirr, Alexander Kuznetsov, Georgios Kopanas, and Anton Kaplanyan.  
66 N-dimensional gaussians for fitting of high dimensional functions. In *ACM SIGGRAPH 2024*  
67 *Conference Papers*, pages 1–11, 2024.
- 68 [3] Zhongpai Gao, Benjamin Planche, Meng Zheng, Anwesa Choudhuri, Terrence Chen, and Ziyang  
69 Wu. 6dgs: Enhanced direction-aware gaussian splatting for volumetric rendering. In *ICLR*,  
70 2025.
- 71 [4] Zhongpai Gao, Benjamin Planche, Meng Zheng, Anwesa Choudhuri, Terrence Chen, and Ziyang  
72 Wu. 7dgs: Unified spatial-temporal-angular gaussian splatting. *arXiv preprint arXiv:2503.07946*,  
73 2025.
- 74 [5] Wenbo Hu, Xiangjun Gao, Xiaoyu Li, Sijie Zhao, Xiaodong Cun, Yong Zhang, Long Quan, and  
75 Ying Shan. Depthcrafter: Generating consistent long depth sequences for open-world videos.  
76 *arXiv preprint arXiv:2409.02095*, 2024.
- 77 [6] Takeo Igarashi, Tomer Moscovich, and John F Hughes. As-rigid-as-possible shape manipulation.  
78 *ACM transactions on Graphics (TOG)*, 24(3):1134–1141, 2005.
- 79 [7] Bernhard Kerbl, Georgios Kopanas, Thomas Leimkühler, and George Drettakis. 3d gaussian  
80 splatting for real-time radiance field rendering. In *ACM Trans. Graph.*, 2023.
- 81 [8] Jiahui Lei, Yijia Weng, Adam Harley, Leonidas Guibas, and Kostas Daniilidis. Mosca: Dynamic  
82 gaussian fusion from casual videos via 4d motion scaffolds. In *CVPR*, 2025.
- 83 [9] Yiming Liang, Tianhan Xu, and Yuta Kikuchi. Himor: Monocular deformable gaussian  
84 reconstruction with hierarchical motion representation. In *CVPR*, 2025.
- 85 [10] Jongmin Park, Minh-Quan Viet Bui, Juan Luis Gonzalez Bello, Jaeho Moon, Jihyong Oh, and  
86 Munchurl Kim. Splinesg: Robust motion-adaptive spline for real-time dynamic 3d gaussians  
87 from monocular video. In *CVPR*, 2025.
- 88 [11] Olga Sorkine and Marc Alexa. As-rigid-as-possible surface modeling. In *Symposium on*  
89 *Geometry processing*, volume 4, pages 109–116. Citeseer, 2007.
- 90 [12] Colton Stearns, Adam Harley, Mikaela Uy, Florian Dubost, Federico Tombari, Gordon Wet-  
91 zstein, and Leonidas Guibas. Dynamic gaussian marbles for novel view synthesis of casual  
92 monocular videos. In *SIGGRAPH Asia*, 2024.
- 93 [13] Yuxi Xiao, Qianqian Wang, Shangzhan Zhang, Nan Xue, Sida Peng, Yujun Shen, and Xiaowei  
94 Zhou. Spatialtracker: Tracking any 2d pixels in 3d space. In *Proceedings of the IEEE/CVF*  
95 *Conference on Computer Vision and Pattern Recognition*, pages 20406–20417, 2024.
